# Supplementary material for: Improved efficiency and stability of Pb–Sn binary perovskite solar cells by Cs substitution
Source: Royal Society of Chemistry journal article supplement (doi:10.1039/c6ta07712a), 2016-01-01
Supplement: c6ta07712a1.pdf [file c6ta07712a1.pdf]

## Supporting Information

### Improve Efficiency and Stability of Pb-Sn Binary Perovskite Solar Cells by Cs Substitution

*Xiao Liu<sup>1,2†</sup>, Zhibin Yang<sup>1†</sup>, Chu-Chen Chueh<sup>1</sup>, Adharsh Rajagopal<sup>1</sup>, Spencer T. Williams<sup>1</sup>, Ye Sun<sup>2</sup> and Alex K.-Y. Jen<sup>1,\*</sup>*

<sup>1</sup>X. Liu, Dr. Z. Yang, Dr. C.-C. Chueh, S. T. Williams, A. Rajagopal and Prof. A. K.-Y. Jen  
Department of Materials Science and Engineering, University of Washington, Seattle, WA,  
98195-2120, USA

<sup>2</sup>Condensed Matter Science and Technology Institute, School of Science, Harbin Institute of  
Technology, Harbin 150080, China

\*Corresponding author. E-mail: [ajen@u.washington.edu](mailto:ajen@u.washington.edu)

† These two authors contribute equally to this work

**Keywords:** Cs substitution, Pb-Sn alloy perovskite, Compositional engineering, Stability

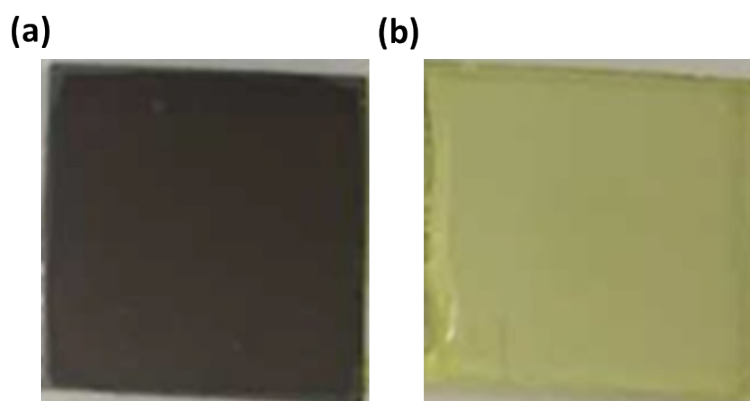

**Figure S1.** MASnI<sub>3</sub> (a) and CsSnI<sub>3</sub> (b) perovskite films after toluene washing process before annealing.

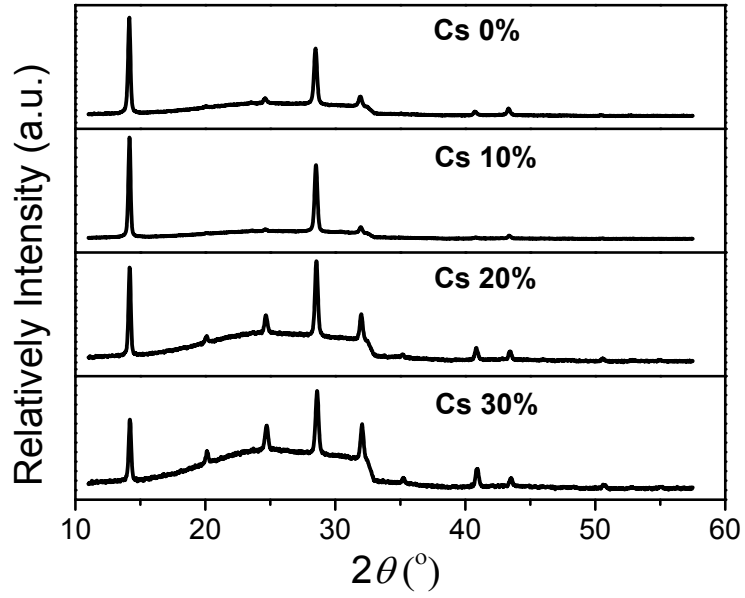

**Figure S2.** Refined XRD spectra of  $\text{MA}_{1-y}\text{Cs}_y\text{Pb}_{0.5}\text{Sn}_{0.5}\text{I}_3$ .

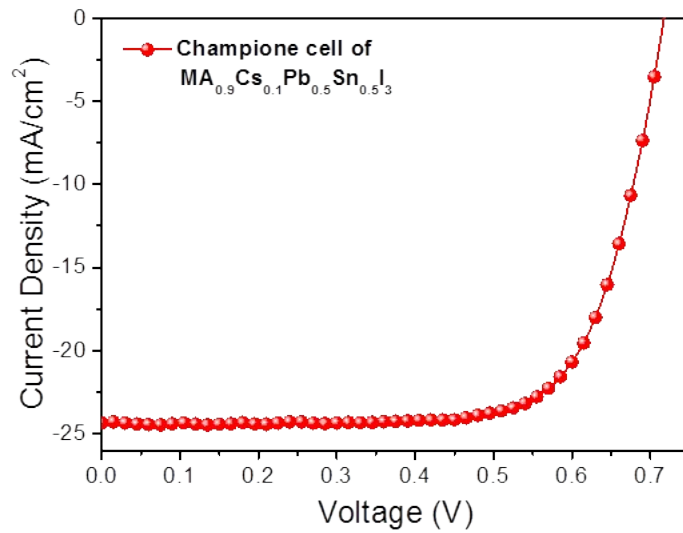

**Figure S3.**  $J$ - $V$  curve of the champion device based on  $\text{MA}_{0.9}\text{Cs}_{0.1}\text{Pb}_{0.5}\text{Sn}_{0.5}\text{I}_3$  perovskite measured under AM 1.5 illumination under reverse scan.

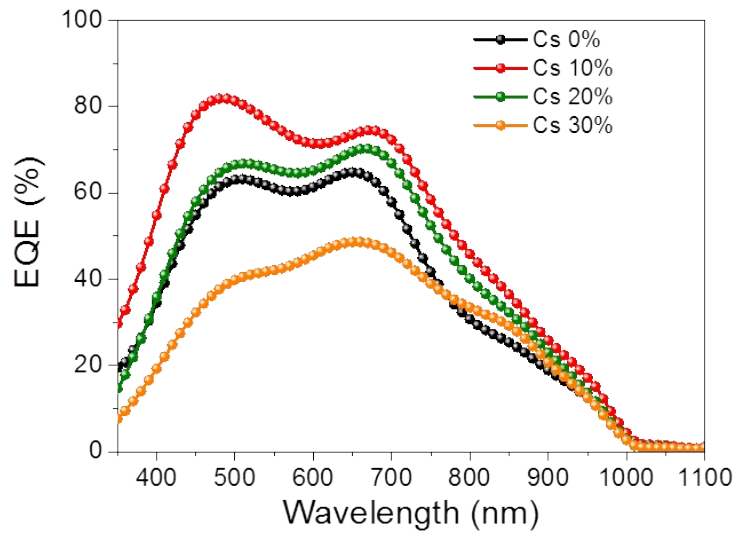

**Figure S4.** EQE of  $\text{MA}_{1-x}\text{Cs}_x\text{Pb}_{0.5}\text{Sn}_{0.5}\text{I}_3$  ( $x=0, 0.1, 0.2, 0.3$ ) PVSCs.

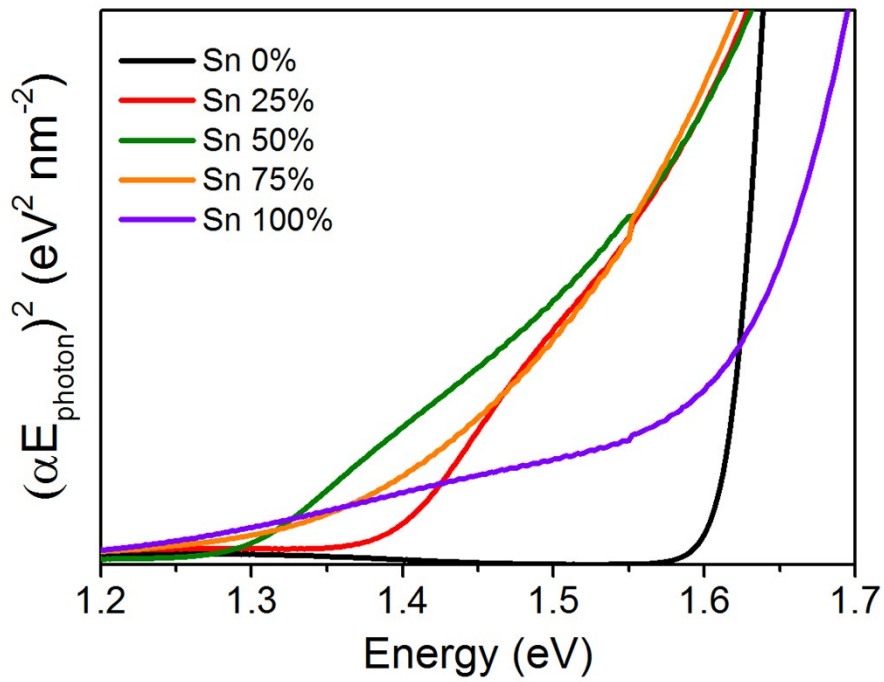

**Figure S5.** Tauc-plot analysis of  $\text{MA}_{0.9}\text{Cs}_{0.1}\text{Pb}_{1-x}\text{Sn}_x\text{I}_3$  ( $x=0, 0.25, 0.5, 0.75, 1$ ) perovskite films.

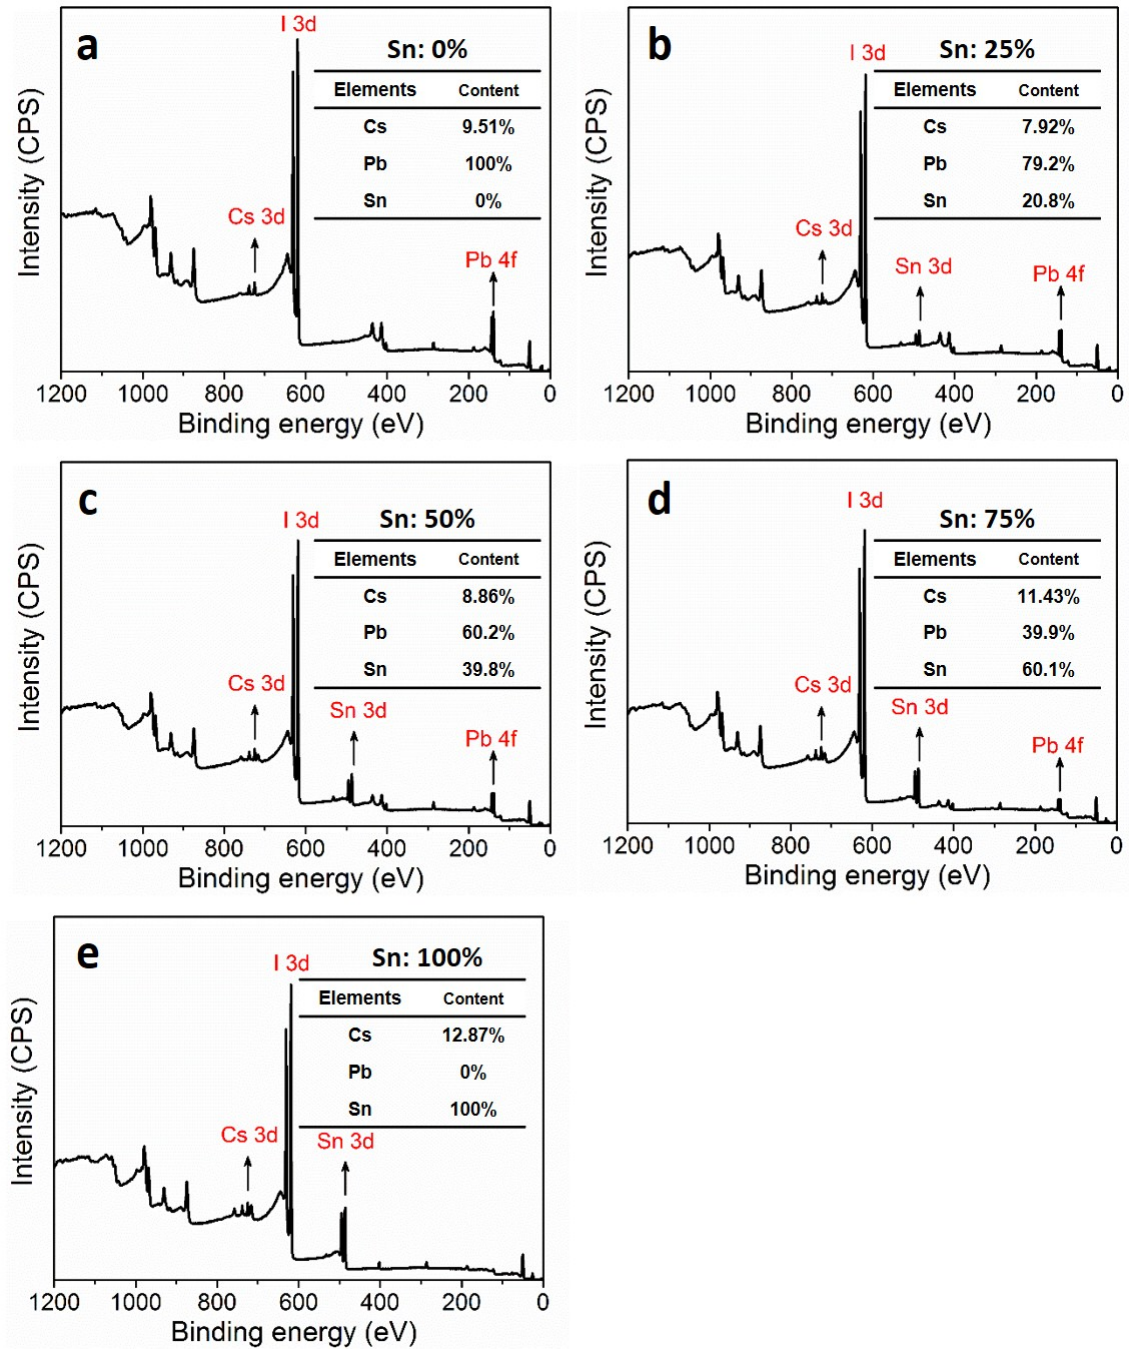

**Figure S6.** XPS analysis of  $\text{MA}_{0.9}\text{Cs}_{0.1}\text{Pb}_{1-x}\text{Sn}_x\text{I}_3$  ( $x=0, 0.25, 0.5, 0.75, 1$ ) films.

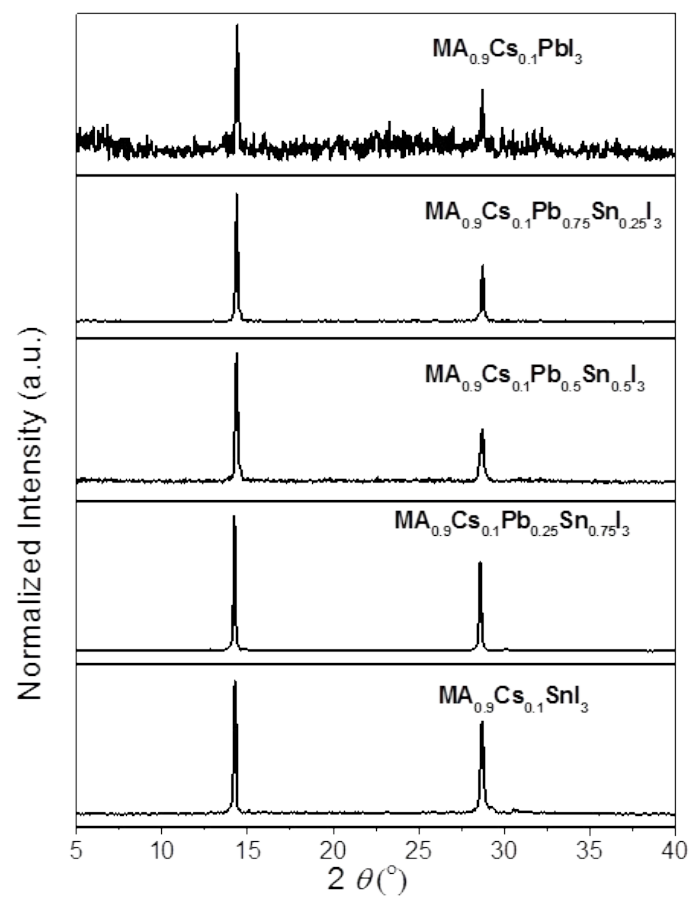

**Figure S7.** XRD spectra of MA<sub>0.9</sub>Cs<sub>0.1</sub>Pb<sub>1-x</sub>Sn<sub>x</sub>I<sub>3</sub> (x=0, 0.25, 0.5, 0.75, 1) films.

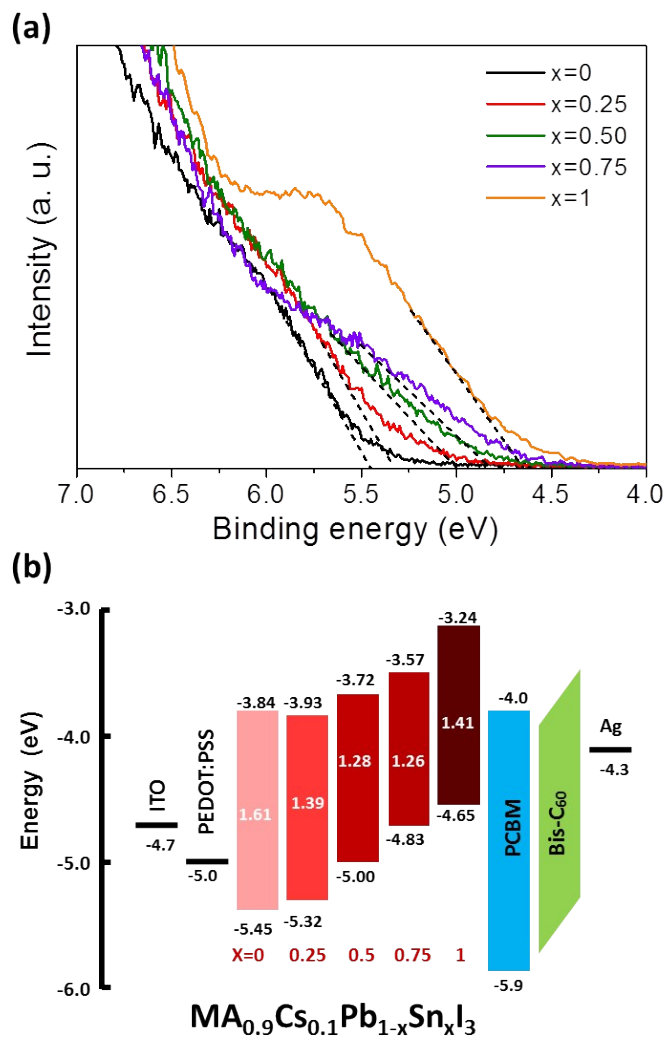

**Figure S8.** (a) UPS and (b) the corresponding energy diagram of MA<sub>0.9</sub>Cs<sub>0.1</sub>Pb<sub>1-x</sub>Sn<sub>x</sub>I<sub>3</sub> (x=0, 0.25, 0.5, 0.75, 1) films.

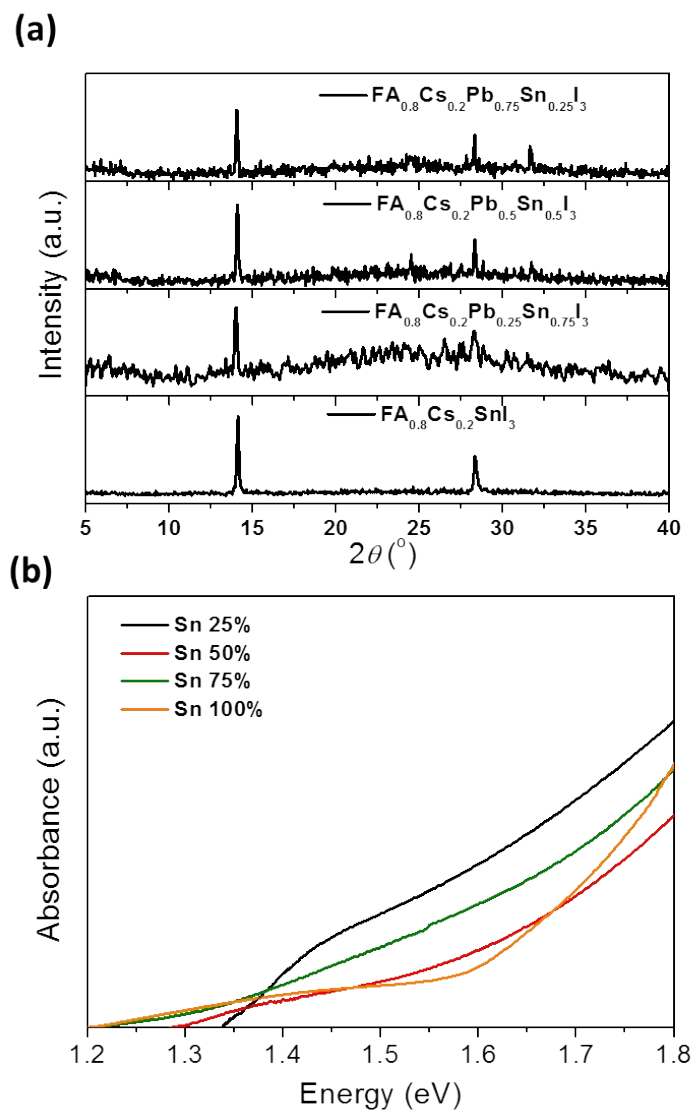

**Figure S9.** (a) XRD and (b) UV-Vis spectra of  $\text{FA}_{0.8}\text{Cs}_{0.2}\text{Pb}_{1-x}\text{Sn}_x\text{I}_3$  ( $x=0.25, 0.5, 0.75, 1$ ) films.

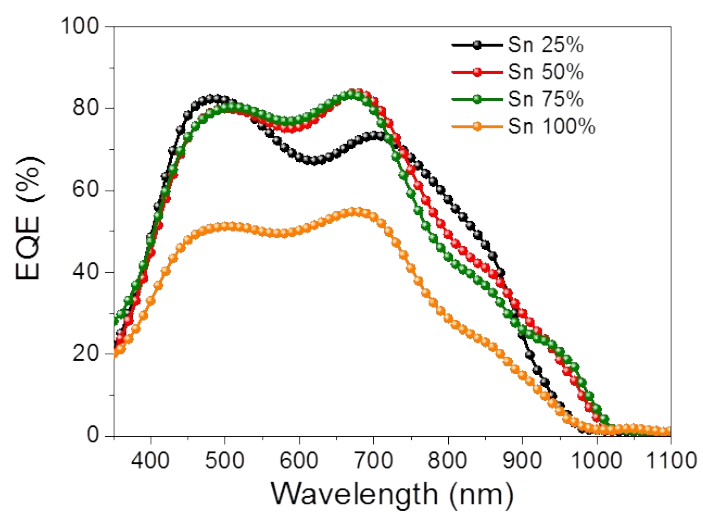

**Figure S10.** EQE of  $\text{FA}_{0.8}\text{Cs}_{0.2}\text{Pb}_{1-x}\text{Sn}_x\text{I}_3$  ( $x=0.25, 0.5, 0.75, 1$ ) PVSCs.



**Table S1.** Lattice parameters and volume of MA<sub>1-x</sub>Cs<sub>x</sub>Pb<sub>0.5</sub>Sn<sub>0.5</sub>I<sub>3</sub> (x=0, 0.1, 0.2, 0.3)

| Crystal Lattice                                                                        | <i>a</i><br>(Å) | <i>c</i><br>(Å) | Volume<br>(Å <sup>3</sup> ) |
|----------------------------------------------------------------------------------------|-----------------|-----------------|-----------------------------|
| MAPb <sub>0.5</sub> Sn <sub>0.5</sub> I <sub>3</sub>                                   | 8.85            | 12.53           | 981.4                       |
| MA <sub>0.9</sub> Cs <sub>0.1</sub> Pb <sub>0.5</sub> Sn <sub>0.5</sub> I <sub>3</sub> | 8.84            | 12.54           | 979.7                       |
| MA <sub>0.8</sub> Cs <sub>0.2</sub> Pb <sub>0.5</sub> Sn <sub>0.5</sub> I <sub>3</sub> | 8.83            | 12.49           | 973.3                       |
| MA <sub>0.7</sub> Cs <sub>0.3</sub> Pb <sub>0.5</sub> Sn <sub>0.5</sub> I <sub>3</sub> | 8.81            | 12.46           | 968.6                       |

**Table S2.** Performance of MA<sub>1-x</sub>Cs<sub>x</sub>Pb<sub>0.5</sub>Sn<sub>0.5</sub>I<sub>3</sub> (x=0, 0.1, 0.2, 0.3) PVSCs measured under AM 1.5 illumination under reverse scan.

| Composition                                                                            | <i>V</i> <sub>oc</sub><br>(V) | <i>J</i> <sub>sc</sub><br>(mA/cm <sup>2</sup> ) | FF (%) | PCE (%) |
|----------------------------------------------------------------------------------------|-------------------------------|-------------------------------------------------|--------|---------|
| MAPb <sub>0.5</sub> Sn <sub>0.5</sub> I <sub>3</sub>                                   | 0.62                          | 18.65                                           | 55.0%  | 6.36    |
| MA <sub>0.9</sub> Cs <sub>0.1</sub> Pb <sub>0.5</sub> Sn <sub>0.5</sub> I <sub>3</sub> | 0.70                          | 23.32                                           | 61.7%  | 10.07   |
| MA <sub>0.8</sub> Cs <sub>0.2</sub> Pb <sub>0.5</sub> Sn <sub>0.5</sub> I <sub>3</sub> | 0.60                          | 20.58                                           | 60.7%  | 7.50    |
| MA <sub>0.7</sub> Cs <sub>0.3</sub> Pb <sub>0.5</sub> Sn <sub>0.5</sub> I <sub>3</sub> | 0.39                          | 14.96                                           | 50.4%  | 2.94    |

**Table S3.** Performance of FAPb<sub>1-x</sub>Sn<sub>x</sub>I<sub>3</sub> and FA<sub>0.8</sub>Cs<sub>0.2</sub>Pb<sub>1-x</sub>Sn<sub>x</sub>I<sub>3</sub> (x=0.25, 0.5, 0.75, 1) PVSCs measured under AM 1.5 illumination with reverse scan.

| Composition                                                                              | <i>V</i> <sub>oc</sub><br>(V) | <i>J</i> <sub>sc</sub> (mA/cm <sup>2</sup> ) | FF (%) | PCE (%) |
|------------------------------------------------------------------------------------------|-------------------------------|----------------------------------------------|--------|---------|
| FAPb <sub>0.75</sub> Sn <sub>0.25</sub> I <sub>3</sub>                                   | 0.75                          | 19.48                                        | 70.3%  | 10.27   |
| FAPb <sub>0.5</sub> Sn <sub>0.5</sub> I <sub>3</sub>                                     | 0.60                          | 21.52                                        | 65.4%  | 8.44    |
| FAPb <sub>0.25</sub> Sn <sub>0.75</sub> I <sub>3</sub>                                   | 0.46                          | 20.43                                        | 56.1%  | 5.27    |
| FASnI <sub>3</sub>                                                                       | 0.04                          | 11.73                                        | 23.4%  | 0.11    |
| FA <sub>0.8</sub> Cs <sub>0.2</sub> Pb <sub>0.75</sub> Sn <sub>0.25</sub> I <sub>3</sub> | 0.84                          | 22.73                                        | 75.7%  | 14.46   |
| FA <sub>0.8</sub> Cs <sub>0.2</sub> Pb <sub>0.5</sub> Sn <sub>0.5</sub> I <sub>3</sub>   | 0.70                          | 24.30                                        | 68.3%  | 11.63   |
| FA <sub>0.8</sub> Cs <sub>0.2</sub> Pb <sub>0.25</sub> Sn <sub>0.75</sub> I <sub>3</sub> | 0.56                          | 24.44                                        | 57.2%  | 7.83    |
| FA <sub>0.8</sub> Cs <sub>0.2</sub> SnI <sub>3</sub>                                     | 0.24                          | 16.05                                        | 35.8%  | 1.38    |
